# Supplementary material
Source: PubMed Central journal article supplement (PMC3268274)
Supplement: 1115983109_pnas.201115983SI.pdf [file 1115983109_pnas.201115983SI.pdf]

# Supporting Information

Wang et al. 10.1073/pnas.1115983109

Supporting Information Corrected August 01, 2016

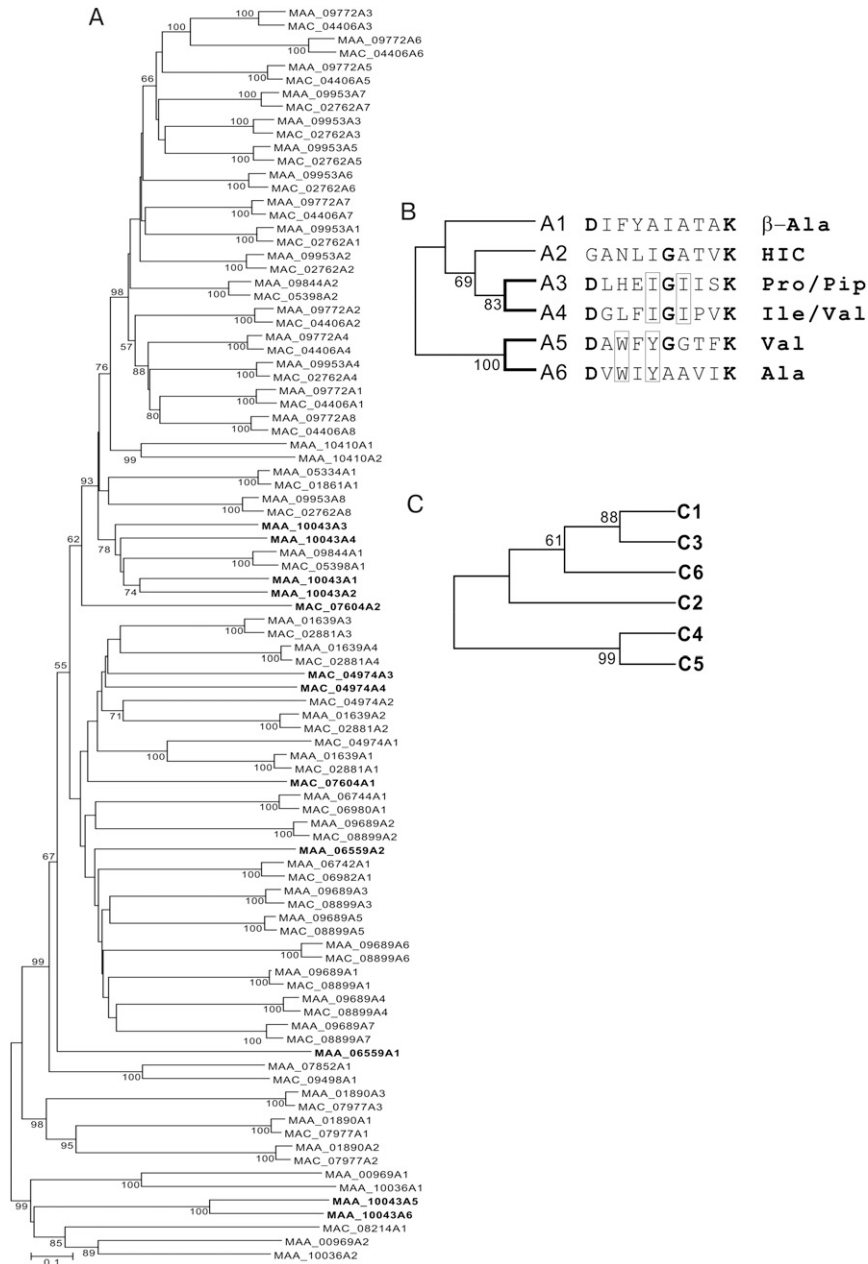

Fig. S1. Phylogenetic analysis. (A) Analysis of *M. robertsii* (loci tagged as MAA) and *M. acridum* (loci tagged as MAC) NRPSs based on their adenlylation domain sequences. The domains highlighted in bold indicate that the corresponding NRPS gene is present in one species but absent in the other. (B) Phylogenetic and signature analysis of DtxS1 A domains. (C) Analysis of DtxS1 C domains.

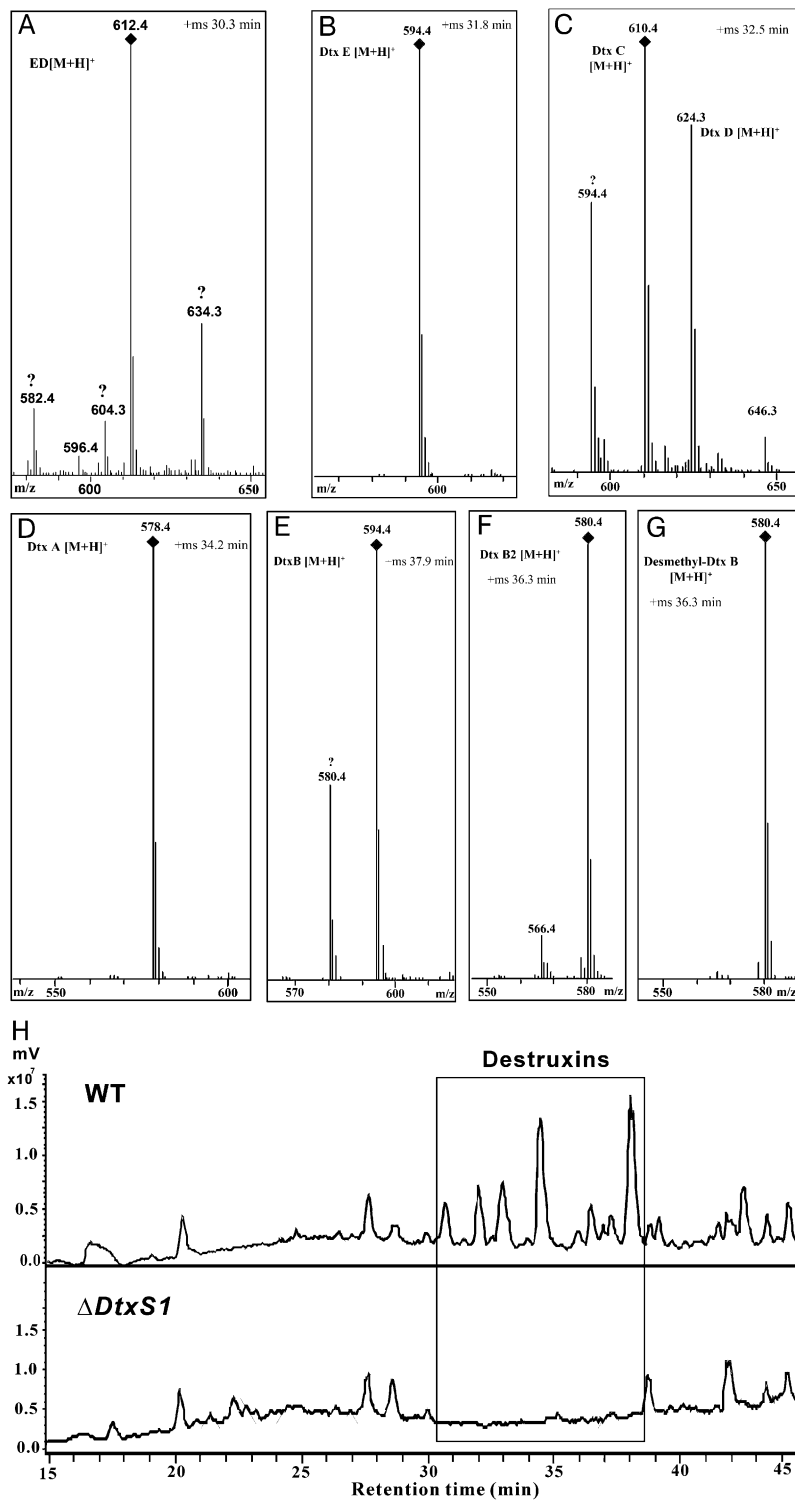

**Fig. S2.** Mass spectrometric and high-performance ion chromatography analysis. (A) Mass spectrum of dtx E-diol in the cultures of *M. robertsii* strain ARSEF 23 after incubation in CD medium for 7 d. (B) Mass spectrum of dtx E. (C) Mass spectra of dtx C and dtx D. (D) Mass spectrum of dtx A. (E) Mass spectrum of dtx B. (F) Mass spectrum of dtx B<sub>2</sub>. (G) Mass spectrum of desmethyl-dtx B. (H) High-performance ion chromatography analysis of dtxs produced *in insecta* by the WT and  $\Delta dtxS1$  on mycosed silkworm larvae.



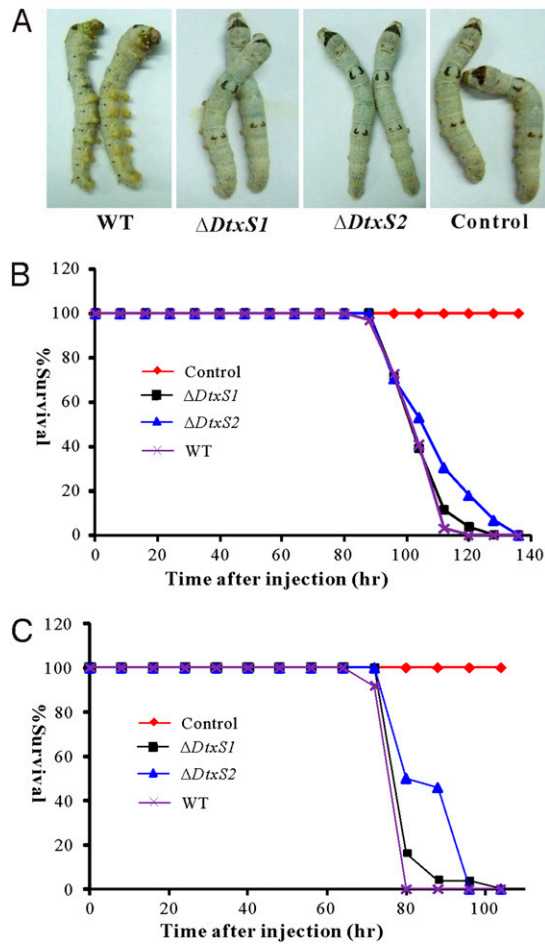

**Fig. 54.** Insect bioassays. (A) The WT and mutant strains of *M. robertsii* were grown in the CD medium for 7 d. The culture filtrates were used for injection of the fifth instar larvae of silkworms (50  $\mu$ L each insect). The insects injected with the WT sample demonstrated an instant paralysis symptom and died within a few minutes. In contrast, no apparent symptoms were observed for those injected with the mutant culture filtrates or CD medium (control). (B) Survival curves of locusts after injection of a spore suspension ( $1 \times 10^6$  spores/mL; 10  $\mu$ L per insect) of the WT,  $\Delta dtxS1$ , and  $\Delta dtxS2$  mutants. (C) Survival curves of silkworm larvae after injection of a spore suspension ( $5 \times 10^5$  spores/mL; 10  $\mu$ L each) of the WT,  $\Delta dtxS1$ , and  $\Delta dtxS2$  mutants. Insects injected with water were included as controls.

**Table S1. Modulation analysis of NRPS proteins encoded in the *M. robertsii* and *M. acridum* genomes**

| Species and locus   | No. of amino acids | No. of A domains | No. of C domains | Modulation analysis*                    |
|---------------------|--------------------|------------------|------------------|-----------------------------------------|
| <i>M. robertsii</i> |                    |                  |                  |                                         |
| MAA_00969           | 1,983              | 2                | 2                | ATC-ATC                                 |
| MAA_01639           | 5,433              | 4                | 4                | ATEC-ATC-ATC-ATEC                       |
| MAA_01890           | 4,845              | 3                | 4                | AC-ATC-CACC                             |
| MAA_05334           | 1,800              | 1                | 2                | ATC-TC                                  |
| MAA_06559           | 1,975              | 2                | 1                | ATC-A                                   |
| MAA_06742           | 1,301              | 1                | 1                | ATC                                     |
| MAA_06744           | 1,854              | 1                | 1                | ATC                                     |
| MAA_07852           | 1,647              | 1                | 2                | C-ATC                                   |
| MAA_09689           | 9,413              | 7                | 7                | ATEC-ATC-ATC-ATEC-ATEC-ATEC-ATC         |
| MAA_09772           | 10,277             | 8                | 8                | ATC-ATC-ATEC-ATC-ATEC-ATEC-ATC-ATC-T    |
| MAA_09844           | 3,552              | 2                | 3                | ATC-ATEC-TC                             |
| MAA_09953           | 10,188             | 8                | 8                | ATC-ATC-ATEC-ATC-AEC-ATC-ATEC-ATC       |
| MAA_10036           | 2,139              | 2                | 2                | ATC-ATC                                 |
| <b>MAA_10043</b>    | <b>7,898</b>       | <b>6</b>         | <b>6</b>         | <b>ATC-ATEC-ATC-ATC-A(NM)TC-A(NM)TC</b> |
| MAA_10410           | 3,183              | 2                | 2                | TC-ATEC-AT                              |
| <i>M. acridum</i>   |                    |                  |                  |                                         |
| MAC_01861           | 1,644              | 1                | 2                | ATC-TC                                  |
| MAC_02762           | 10,186             | 8                | 8                | ATC-ATC-ATEC-ATC-AEC-ATC-ATEC-ATC       |
| MAC_02881           | 5,435              | 4                | 4                | ATEC-ATC-ATC-ATEC                       |
| MAC_04406           | 10,285             | 8                | 8                | ATC-ATC-ATEC-ATC-ATEC-ATEC-ATC-ATC-T    |
| MAC_04974           | 5,358              | 4                | 4                | ATEC-ATC-ATC-ATEC                       |
| MAC_05398           | 3,530              | 2                | 3                | ATC-ATEC-TC                             |
| MAC_06980           | 1,793              | 1                | 1                | ATC                                     |
| MAC_06982           | 889                | 1                | 1                | ATC                                     |
| MAC_07604           | 2,607              | 2                | 2                | ATC-ATEC                                |
| MAC_07977           | 4,838              | 3                | 4                | AC-ACC-ACC                              |
| MAC_08214           | 1,693              | 1                | 1                | T-ATTC                                  |
| MAC_08899           | 9,390              | 7                | 6                | ATEC-ATC-ATC-ATEC-ATEC-ATEC-AT          |
| MAC_09498           | 1,616              | 1                | 2                | C-ATC                                   |

For modulation analysis: A, adenylation domain; C, condensation domain; E, epimerization domain; and NM, N-methylation domain; T, thiolation (or peptidyl carrier protein, PCP) domain.

\*The locus MAA\_10043 highlighted in bold is verified for the biosynthesis of dtxs.

**Table S2.** H and C NMR data for structural verifications of dtx B, B<sub>2</sub> and desmethyl-B produced by *M. robertsii*

| No.               | Dtx B*                       |          | Dtx B <sub>2</sub> <sup>†</sup> |         | Desmethyl-Dtx B <sup>†</sup> |          |
|-------------------|------------------------------|----------|---------------------------------|---------|------------------------------|----------|
|                   | δ (H)                        | δ (C)    | δ (H)                           | δ (C)   | δ (H)                        | δ (C)    |
| 1α                | 4.91 m                       | 71.96 d  | 4.96 m                          | 71.9 d  | 4.89 dd, 10.0, 2.8           | 71.53 d  |
| 1β                | 1.38 m<br>1.96 m             | 38.96 t  | 1.39 m<br>1.87 m                | 39.0 d  | 1.28 m<br>1.97 m             | 38.97 t  |
| 1γ                | 1.87 m                       | 24.42 d  | 1.88 m                          | 24.4 d  | 1.43 m                       | 24.47 d  |
| 1δ <sub>1</sub>   | 1.00 d, 6.6                  | 23.37 q  | 1.02 d, 6.4                     | 24.0 q  | 1.01 d, 6.8                  | 21.44 q  |
| 1δ <sub>2</sub>   | 0.87 d, 8.5                  | 15.40 q  | 0.90 d, 6.0                     | 21.5 q  | 0.96 d, 6.8                  | 23.32 q  |
| 1C=O              | —                            | 173.58 s | —                               | 173.2 s | —                            | 171.85 s |
| 2α                | 4.68 d, 7.0                  | 60.74 d  | 4.69 d, 6.8                     | 60.7 d  | 4.23 dd, 9.6, 6.0            | 60.81 d  |
| 2β                | 1.93 m<br>2.51 m             | 28.89 t  | 1.93 m<br>2.55 m                | 28.9 t  | 1.96 m<br>2.16 m             | 30.47 t  |
| 2γ                | 1.32 m<br>1.45 m             | 24.48 t  | 1.95 m<br>2.09 m                | 24.1 t  | 2.06 m                       | 24.18 t  |
| 2δ                | 3.44 m<br>3.92 t, 17.3, 9.0  | 46.48 t  | 3.45 m<br>3.92 m                | 46.5 t  | 3.46 m<br>3.93 m             | 46.61 t  |
| 2C=O              | —                            | 170.97 s | —                               | 171.1 s | —                            | 171.67 s |
| 3NH               | 7.20 d, 9.1                  | —        | 7.25 d, 9.2                     | —       | 7.08 d, 8.8                  | —        |
| 3α                | 4.89 d, 7.7                  | 53.69 d  | 4.91 m                          | 54.1 d  | 4.55 dd, 9.2, 6.4            | 55.65 d  |
| 3β                | 1.94 m                       | 37.52 d  | 2.17 m                          | 30.3 d  | 1.93 m                       | 38.43 d  |
| 3γ <sub>1</sub>   | 1.93 m<br>2.08 m             | 24.13 t  | 0.95 d, 7.2                     | 17.3 q  | 1.43 m                       | 25.09 t  |
| 3γ <sub>2</sub>   | 0.96 d, 6.9                  | 21.49 q  | 0.98 d, 6.4                     | 19.4 q  | 0.92 d, 6.4                  | 15.33 q  |
| 3δ                | 0.85 d, 7.2                  | 11.37 q  | —                               | —       | 0.86 t, 6.4                  | 11.36 q  |
| 3C=O              | —                            | 169.72 s | —                               | 169.9 s | —                            | 169.69 s |
| 4NCH <sub>3</sub> | 3.23 s                       | 30.86 q  | 3.25 s                          | 30.8 q  | 6.49(4NH), 6.4               | —        |
| 4α                | 4.94 d, 11.0                 | 58.14 d  | 4.93 m                          | 58.2 d  | 4.61 d, 6.4                  | 56.31 d  |
| 4β                | 2.34 m                       | 27.27 d  | 2.33 m                          | 27.4 d  | 2.43 m                       | 28.45 d  |
| 4γ <sub>1</sub>   | 0.90 d, 6.3                  | 19.66 q  | 0.90 d, 6.0                     | 19.8 q  | 0.85 d, 7.2                  | 19.67 q  |
| 4γ <sub>2</sub>   | 0.95 d, 7.5                  | 20.04 q  | 0.97 d, 6.4                     | 20.0 q  | 0.83 d, 7.2                  | 19.67 q  |
| 4C=O              | —                            | 171.12 s | —                               | 171.4 s | —                            | 170.83 s |
| 5NCH <sub>3</sub> | 2.74 s                       | 28.10 q  | 2.75 s                          | 28.1 q  | 2.73 s                       | 29.15 q  |
| 5α                | 5.20 q, 14.6, 6.8            | 55.49 d  | 5.21 q, 14.8, 6.8               | 55.5 d  | 5.06 dd, 10.0, 6.8           | 55.66 d  |
| 5β                | 1.32 d, 6.6                  | 15.26 q  | 1.32 d, 6.8                     | 15.1 q  | 1.32 d, 6.8                  | 14.84 q  |
| 5C=O              | —                            | 169.73 s | —                               | 169.7 s | —                            | 169.87 s |
| 6NH               | 8.22 d, 9.8                  | —        | 8.14 d, 8.0                     | —       | 8.29 d, 6.8                  | —        |
| 6α                | 2.59 m<br>2.71 m             | 34.44 t  | 2.56 m<br>2.69 m                | 34.4 t  | 2.54 m<br>2.69 m             | 34.26 t  |
| 6β                | 3.11 t, 24.6, 12.7<br>4.08 m | 33.25 t  | 3.10 m<br>4.06 m                | 33.3 t  | 3.16 m<br>3.98 m             | 33.58 t  |
| 6C=O              | —                            | 173.78 s | —                               | 174.0 s | —                            | 173.31 s |

The compounds were dissolved in CDCl<sub>3</sub>. δ in ppm, J in Hz.

\*600/150 MHz.

†400/100 MHz.

**Table S3. Quantification of dtxs E, A, B, and B<sub>2</sub> produced by the WT, mutants, and different species of *Metarhizium* in Czapek Dox broth for 7 d**

| Strains                              | Dtx E (mg/L)   | Dtx A (mg/L)    | Dtx B (mg/L)   | Dtx B <sub>2</sub> (mg/L) |
|--------------------------------------|----------------|-----------------|----------------|---------------------------|
| ARSEF 23                             | 63.1 ± 4.5Cd   | 80.6 ± 4.6Bb    | 43.1 ± 7.1Bb   | 7.8 ± 1.1Bb               |
| $\Delta$ DtxS1                       | 0              | 0               | 0              | 0                         |
| $\Delta$ DtxS1+Dtx B                 | 15.1 ± 2.3Df   | 5.6 ± 0.6Dd     | 43.7 ± 11.2Bb  | 0                         |
| $\Delta$ DtxS2                       | 0              | 0               | 232.2 ± 31.1Aa | 32.9 ± 4.4Aa              |
| $\Delta$ DtxS1 $\Delta$ DtxS2 +Dtx B | 0              | 0               | 56.8 ± 13.1Bb  | 0                         |
| $\Delta$ DtxS3                       | 0              | 0               | 0              | 0                         |
| $\Delta$ DtxS3+HIC                   | 19.2 ± 5.1Df   | 2.8 ± 0.3Dd     | 1.6 ± 0.8Dd    | 0.1 ± 0Cd                 |
| $\Delta$ DtxS4                       | 0              | 0               | 0              | 0                         |
| $\Delta$ DtxS4+ $\beta$ -Ala         | 92.6 ± 12.7Bb  | 105.1 ± 18.6Bb  | 58.1 ± 10.3Bb  | 10.9 ± 2.7Bb              |
| ARSEF 2575                           | 41.6 ± 3.5Ce   | 68.4 ± 8.0CBc   | 36.3 ± 1.9ABb  | 5.5 ± 0.4BCc              |
| CQMa 102                             | 0              | 0               | 0              | 0                         |
| ARSEF 324                            | 0              | 0               | 0              | 0                         |
| ARSEF 549                            | 63.1 ± 6.2Cd   | 37.2 ± 1.95Cc   | 7.6 ± 2.1Cc    | 0.3 ± 0Cd                 |
| V275                                 | 25.1 ± 1.3De   | 42.4 ± 5.8CBc   | 14.5 ± 2.5Cc   | 0.7 ± 0.25Cd              |
| ARSEF 576                            | 93.6 ± 8.8Bb   | 42.2 ± 1.1CBc   | 12.5 ± 0.4Cc   | 0.3 ± 0Cd                 |
| ARSEF 1009                           | 38.6 ± 4.9Ce   | 47.9 ± 14.5BCbc | 11.5 ± 2.4Cc   | 2.5 ± 0.1Cc               |
| ARSEF 297                            | 0              | 0               | 0              | 0                         |
| ARSEF 3297                           | 190.1 ± 10.8Aa | 180.4 ± 22.4Aa  | 57.3 ± 5.4Bb   | 8.5 ± 0.5Bb               |
| ARSEF 1941                           | 0              | 0               | 0              | 0                         |
| ARSEF 4124                           | 0              | 0               | 0              | 0                         |

The data are presented as averages ± SD (SD). Capital and lower letters in the same column show the difference levels at  $\alpha = 0.01$  and  $\alpha = 0.05$ , respectively, between species/strains by ANOVA Duncan's tests. The values tagged with the same letter mean no significant differences between each other.

**Table S4. Insect hosts and geographic origins of the *Metarhizium* species included in this study**

| Strains    | Species               | Original insect hosts                                    | Geographic origin   |
|------------|-----------------------|----------------------------------------------------------|---------------------|
| ARSEF 23   | <i>M. robertsii</i>   | Coleoptera: Elateridae                                   | USA: North Carolina |
| ARSEF 2575 | <i>M. robertsii</i>   | <i>Curculio caryae</i> [Coleoptera: Curculionidae]       | USA: North Carolina |
| CQMa 102   | <i>M. acridum</i>     | <i>Ceracris kiangsu</i> [Orthoptera: Acrididae]          | China: Chongqing    |
| ARSEF 324  | <i>M. acridum</i>     | <i>Austracris guttulosa</i> [Orthoptera: Acrididae]      | Australia           |
| ARSEF 549  | <i>M. anisopliae</i>  | Not available                                            | Brazil              |
| ARSEF 977  | <i>M. guizhouense</i> | <i>Melolontha melolontha</i> [Coleoptera: Scarabaeidae]  | France              |
| ARSEF 576  | <i>M. pingshaense</i> | <i>Nilaparvata lugens</i> [Homoptera: Delphacidae]       | Indonesia           |
| ARSEF 1009 | <i>M. pingshaense</i> | <i>Ornebius kanetataki</i> [Orthoptera: Gryllidae]       | Japan: Tokyo        |
| ARSEF 297  | <i>M. majus</i>       | <i>Xyloryctes jamaicensis</i> [Coleoptera: Scarabaeidae] | Western Samoa       |
| ARSEF 3297 | <i>M. brunneum</i>    | <i>Boophilus</i> sp. [Acari: Ixodidae]                   | Mexico              |
| ARSEF 1941 | <i>M. album</i>       | <i>Nephotettix virescens</i> [Hemiptera: Cicadellidae]   | Philippines: Roxas  |
| ARSEF 4124 | <i>M. frigidum</i>    | <i>Adoryphorus</i> sp. [Coleoptera: Scarabaeidae]        | Australia: Ballarat |

**Table S5. Summary of the original insect host orders for different *Metarhizium* species cataloged in the USDA-ARS culture collection**

| Species                           | Total strain no.* | Original host order (no. of strains isolated from which)                                                                         |
|-----------------------------------|-------------------|----------------------------------------------------------------------------------------------------------------------------------|
| <i>M. robertsii</i>               | 35                | Coleoptera (25), Hemiptera (1), Homoptera (1), Hymenoptera (2), Isoptera (2), Lepidoptera (3), Orthoptera (1)                    |
| <i>M. anisopliae</i> <sup>†</sup> | 38                | Coleoptera (5), Diptera (6), Hemiptera (1), Homoptera (18), Isoptera (2), Lepidoptera (4), Orthoptera (2)                        |
| <i>M. pingshaense</i>             | 38                | Coleoptera (11), Diptera (5), Hemiptera (2), Homoptera (6), Isoptera (2), Lepidoptera (2), Orthoptera (10)                       |
| <i>M. brunneum</i>                | 33                | Acari: Ixodidae (1), Coleoptera (18), Diptera (2), Homoptera (1), Hymenoptera (1), Isoptera (1), Lepidoptera (9), Orthoptera (1) |
| <i>M. guizhouense</i>             | 10                | Coleoptera (5), Diptera (1), Lepidoptera (3), Orthoptera (1)                                                                     |
| <i>M. majus</i> <sup>‡</sup>      | 14                | Coleoptera (12), Lepidoptera (2)                                                                                                 |
| <i>M. acridum</i>                 | 13                | Orthoptera (13)                                                                                                                  |
| <i>M. frigidum</i>                | 15                | Isoptera (14), Coleoptera (1)                                                                                                    |
| <i>M. album</i>                   | 9                 | Homoptera (9)                                                                                                                    |

US Department of Agriculture Agricultural Research Service collection of entomopathogenic fungal cultures (<http://www.ars.usda.gov/is/np/systematics/fungibact.htm>).

\*Only those with clear records to show isolation and purification from insects were summarized.

<sup>†</sup>The total number only includes the strains have been determined as *M. anisopliae* sensu stricto.

<sup>‡</sup>The number includes the records of the species of *M. majus* and *M. anisopliae* var. *majus*.

Table S6. Primers used for gene deletions and mutant verifications

| Genes                                            |      | Primers*                        | Restriction enzymes | Length (bp) <sup>†</sup> |
|--------------------------------------------------|------|---------------------------------|---------------------|--------------------------|
| MAA_10034                                        | U1   | CGCGGATCCCATTCGCTCTTTACGCTGTG   | BamHI               | 937                      |
|                                                  | U2   | CGCGGATCCGGCCTGATATCCTGCGTATT   | BamHI               |                          |
|                                                  | L1   | TGCTCTAGAGCAGGCACCAGAATTGACTT   | XbaI                | 866                      |
|                                                  | L2   | TGCTCTAGACTTGTGGCCGTTACATGAT    | XbaI                |                          |
|                                                  | F    | CAGGAGGACTTCGTGGTGAG            |                     | 790 (WT)                 |
| MAA_10035                                        | R    | AATGAATGTTGCCGTCTCG             |                     | 1,336 (KO)               |
|                                                  | U1   | CGCGGATCCCTAATGCTGCGTCTCCATTTGC | BamHI               | 844                      |
|                                                  | U2   | CGCGGATCCCGTGAAGTTTGCACCTCCACGA | BamHI               |                          |
|                                                  | L1   | TGCTCTAGAATTGGCGACGAGATAGATG    | XbaI                | 1,226                    |
|                                                  | L2   | TGCTCTAGAAGCCCTTTAGGGATTGTTG    | XbaI                |                          |
| MAA_10037                                        | F    | GCAACGTATATCGCGTTTGG            |                     | 1,486 (WT)               |
|                                                  | R    | GTGGAAGTGTGAAGGTTGG             |                     | 1,658 (KO)               |
|                                                  | U1   | CCGGAATCCGGGCATTACTTCCATGACT    | EcoRI               | 1,211                    |
|                                                  | U2   | CCGGAATTC AATATCCGCAAAGTCGACCA  | EcoRI               |                          |
|                                                  | L1   | TGCTCTAGAACCGCTGTGGTAGTATGCAG   | XbaI                | 821                      |
| MAA_10039                                        | L2   | TGCTCTAGAGCTTCGGTGATCCTAATCCA   | XbaI                |                          |
|                                                  | F    | CGTACACCTTGGGCTGAAAA            |                     | 1,507 (WT)               |
|                                                  | R    | AGCTCGACAGTCCTTTGCAT            |                     | 1,856 (KO)               |
|                                                  | U1   | CGCGGATCCCTATCCGATGCACGTGTGAC   | BamHI               | 1,196                    |
|                                                  | U2   | CGCGGATCCGCAAGTGTATCGGGAAAAGG   | BamHI               |                          |
| MAA_10041                                        | L1   | TGCTCTAGACATGTGCCTTGTGTTGGTC    | XbaI                | 530                      |
|                                                  | L2   | TGCTCTAGAGGCCGAGAATTAGGATGGTT   | XbaI                |                          |
|                                                  | F    | CGTACAGTCCAGCACCAATC            |                     | 1,057 (WT)               |
|                                                  | R    | CGTCGAGGTGCACTATTCAA            |                     | 1,445 (KO)               |
|                                                  | U1   | CCGGAATTCGTGAAATGCGTGTTCGATA    | EcoRI               | 1,514                    |
| MAA_10042                                        | U2   | CGCGGATCCACAGCAACGTCCATGATTT    | BamHI               |                          |
|                                                  | L1   | TGCTCTAGATCACAACCTCCACCGGAAT    | XbaI                | 1,802                    |
|                                                  | L2   | TGCTCTAGAGACAAGTTTTGCGTTGTGTTG  | XbaI                |                          |
|                                                  | F    | TGGTCTCCATTACTGCTACCC           |                     | 1,675 (WT)               |
|                                                  | R    | TCAACGCATCTCGTCACCTA            |                     | 1,082 (KO)               |
| MAA_10043                                        | U1   | CCGGAATTCGTGAAATGCGTGTTCGATA    | EcoRI               | 1,949                    |
|                                                  | U2   | CGCGGATCCACAGCAACGTCCATGATTT    | BamHI               |                          |
|                                                  | L1   | TGCTCTAGATCACAACCTCCACCGGAAT    | XbaI                | 617                      |
|                                                  | L2   | TGCTCTAGA GACAAGTTTTGCGTTGTGTTG | XbaI                |                          |
|                                                  | F    | TGGTCTCCATTACTGCTACCC           |                     | 1,020 (WT)               |
| MAA_10043 <i>DtxS1</i>                           | R    | TCAACGCATCTCGTCACCTA            |                     | 1,584 (KO)               |
|                                                  | U1   | CCGGAATTCATGACTCCGTTTGAGCAGA    | EcoRI               | 2,280                    |
|                                                  | U2   | CGCGGATCCCGCCATGTCTTGTATCAACG   | EcoRI               |                          |
|                                                  | L1   | CGGACTAGTTTTGCATCGTACAGCTTTGG   | SpeI                | 2,058                    |
|                                                  | L2   | TGCTCTAGATGAAGATGCGACTGAACGAG   | XbaI                |                          |
| MAA_10043, MAA_10044 <i>DtxS1</i> , <i>DtxS2</i> | F    | GGCGTACGACAAATGGATCT            |                     | 2,030 (WT)               |
|                                                  | R    | CCGCAAAGGCATTATTGAGT            |                     | 1,111 (KO)               |
|                                                  | dtxF | AGATTTGCCGAGCTACCTA             |                     | 424                      |
|                                                  | dtxR | CACCAGATGCGAGTTCTCAA            |                     |                          |
|                                                  | U1   | CCGGAATTC AACCACCAGTTTTGGCTTT   | EcoRI               | 749                      |
| MAA_10044 <i>DtxS2</i>                           | U2   | CCGGAATTCGCGAGGATCAAGGAGTAACG   | EcoRI               |                          |
|                                                  | L1   | CGGACTAGTCCAGGTATGCGGAGCATATT   | SpeI                | 679                      |
|                                                  | L2   | TGCTCTAGAGGGTTGAGTGAAAGGGTCAA   | XbaI                |                          |
|                                                  | F    | TGCTTGAATCCCCAATCTTC            |                     | 1,611 (WT)               |
|                                                  | R    | TGCCATCTGGTCTTTCTTA             |                     | 1,731 (KO)               |
| MAA_10043, MAA_10044 <i>DtxS1</i> , <i>DtxS2</i> | U1   | CGCTGCAGCAACGCCAAATCCAAGAGC     | PstI                | 2,236                    |
|                                                  | U2   | CGCGTCAAGATTCAAGCAGCGCACCTTCC   | PstI                |                          |
|                                                  | L1   | CGGACTAGTATGCAATTTGAGGGCCGTA    | SpeI                | 1,513                    |
|                                                  | L2   | CGGACTAGTCGAGCTTGCCATCTGGTCCT   | SpeI                |                          |
|                                                  | F    | TCGCAGGCACAATGACAAGA            |                     | 426 (WT)                 |
| MAA_10045 <i>DtxS3</i>                           | R    | GCGGCCGTATTCAAGTTGAGC           |                     | 1,367 (KO)               |
|                                                  | U1   | TGCTCTAGAAACCTGCACTCCAGTGAAT    | XbaI                | 711                      |
|                                                  | U2   | TGCTCTAGAGAGATGGTGAATTCGAAGC    | XbaI                |                          |
|                                                  | L1   | CGCGGATCCCGTTGGCATCTGGTAGACT    | BamHI               | 922                      |
|                                                  | L2   | CGCGGATCCATGGAACGGTCAAAGGCATA   | BamHI               |                          |
|                                                  | F    | TGGCAAAGTATCTCTTGAAA            |                     | 1,470 (WT)               |
|                                                  | R    | GTTGTCCTCCGATTAGCGTA            |                     | 1,428 (KO)               |



**Table S6. Cont.**

| Genes                  |    | Primers*                       | Restriction enzymes | Length (bp) <sup>†</sup> |
|------------------------|----|--------------------------------|---------------------|--------------------------|
| MAA_10046 <i>DtxS4</i> | U1 | CGCGGATCCCAATGGAGAGTCCGAGAGA   | BamHI               | 1,820                    |
|                        | U2 | CGCGGATCCCTTTGCCGTTTCCTCATT    | BamHI               |                          |
|                        | L1 | CGGACTAGTGGAAACGGTTGAGGGACTTTT | SpeI                | 2,142                    |
|                        | L2 | CGGACTAGTGGAAAGGACGAGGTTAGTCCA | SpeI                |                          |
|                        | F  | CGAGCAGATGAACTTGACGA           |                     | 1,459 (WT)               |
|                        | R  | ACCGCTCCAATCCCTTG              |                     | 1,228 (KO)               |
| 18S                    | F  | CAGGGCTCTTTGGGTCTTG            |                     | 652                      |
|                        | R  | AGTTTCAGCCTTGCGACCAT           |                     |                          |

\*The introduced enzyme restriction sites are underlined.

<sup>†</sup>The PCR product sizes are provided for the wild-type (WT) and corresponding gene knockout (KO) mutants.
